# Supplementary material for: Leukocyte-specific protein 1 is associated with the stage and tumor immune infiltration of cervical cancer
Source: Springer Nature journal article supplement (doi:10.1038/s41598-025-91066-0), 2025-03-04
Supplement: MOESM2 [file 41598_2025_91066_MOESM2_ESM.pdf]

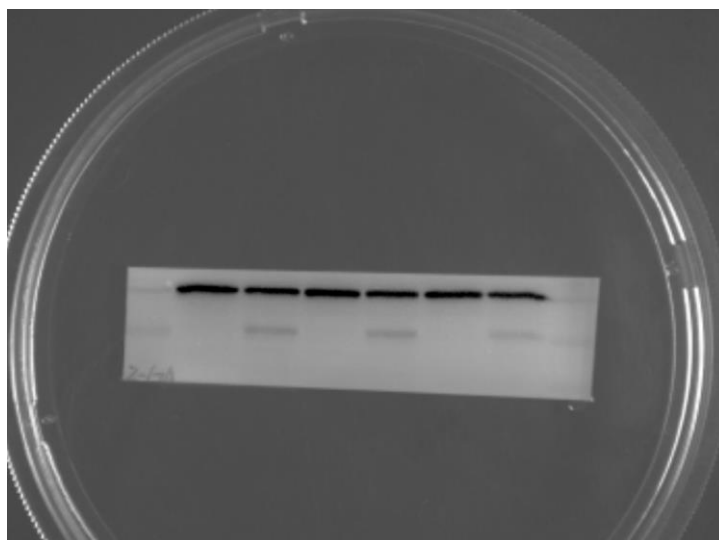

Stage I B GAPDH (P1C1P2C2P3C3)

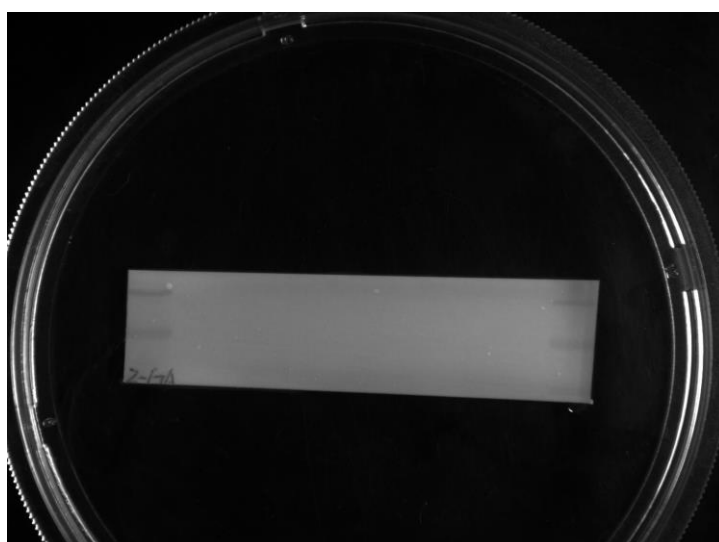

Stage I B GAPDH (P1C1P2C2P3C3) Marker

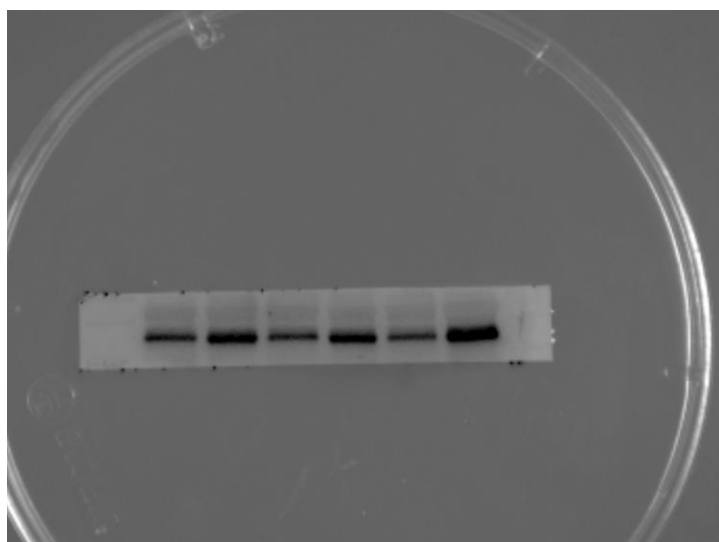

Stage I B LSP1 (P1C1P2C2P3C3)

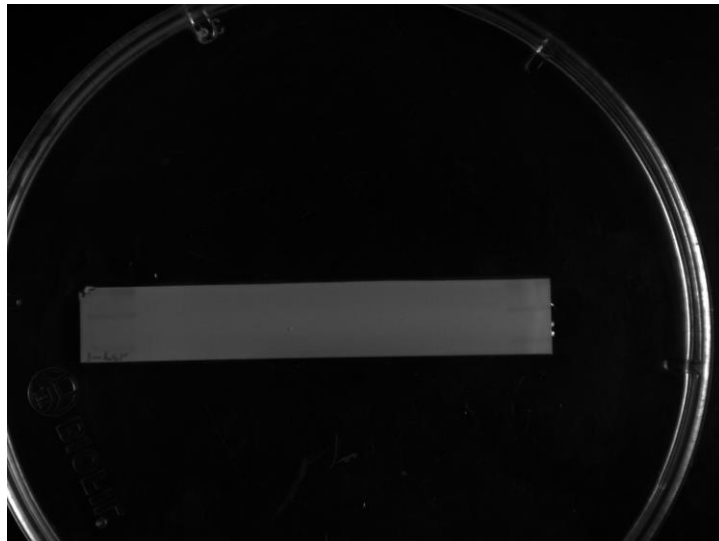

Stage I B LSP1 (P1C1P2C2P3C3) Marker

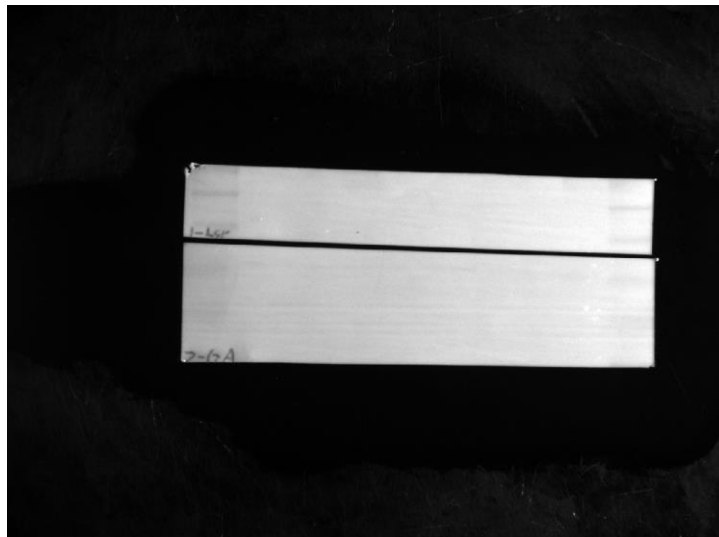

Stage I B

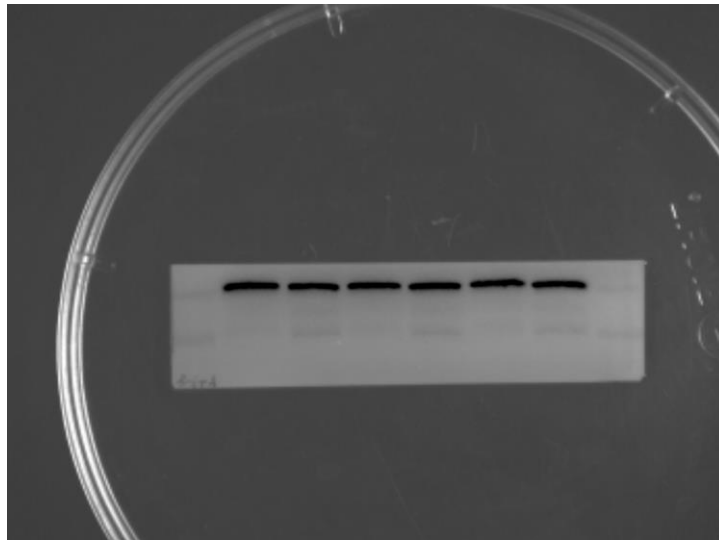

Stage III C GAPDH (P4C4P5C5P6C6)

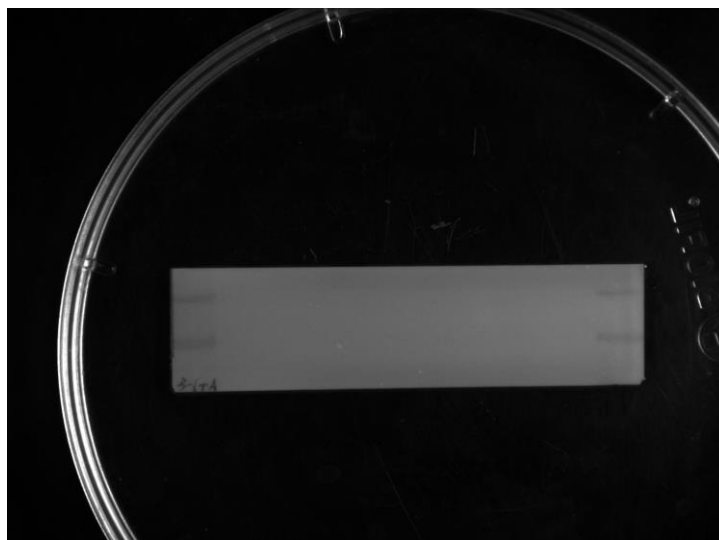

Stage III C GAPDH (P4C4P5C5P6C6) Marker

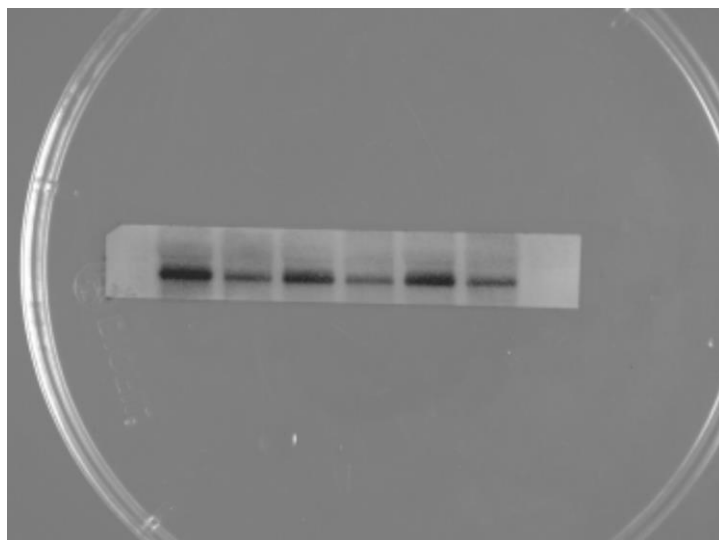

Stage III C LSP1 (P4C4P5C5P6C6)

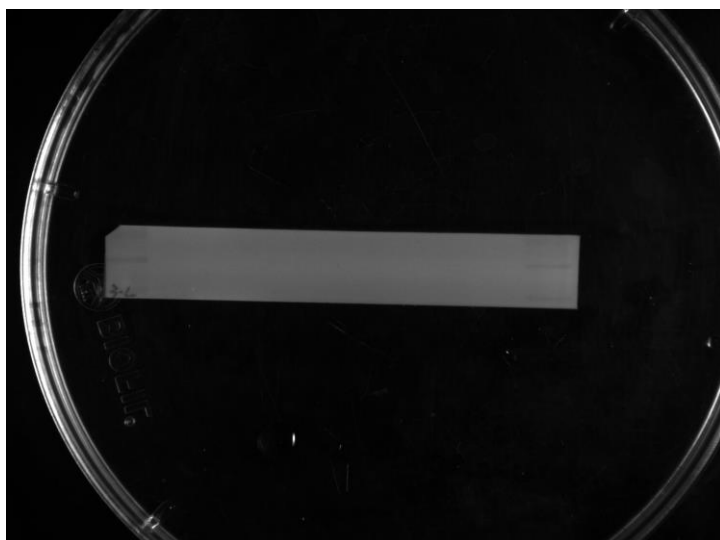

Stage IIIC LSP1 (P4C4P5C5P6C6) Marker

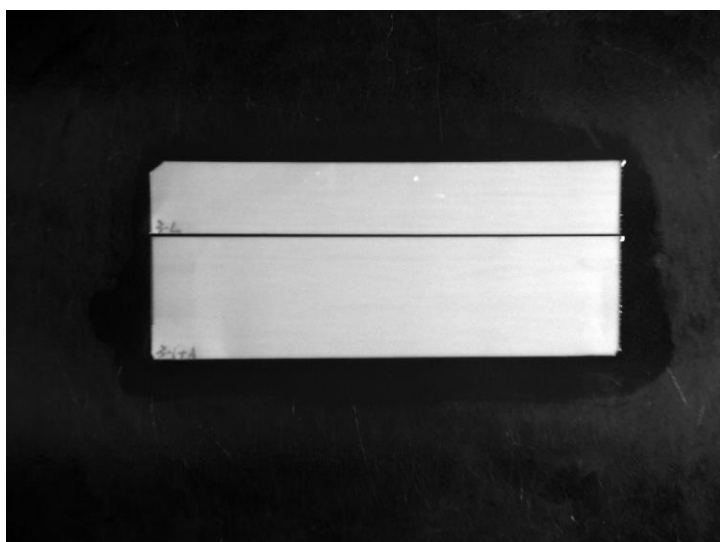

Stage IIIC
